# Supplementary material for: Trimodal hierarchical carbide-derived carbon monoliths from steam- and CO2-activated wood templates for high rate lithium sulfur batteries
Source: Royal Society of Chemistry journal article supplement (doi:10.1039/c5ta06782k), 2015-01-01
Supplement: c5ta06782k1.pdf [file c5ta06782k1.pdf]

# Trimodal hierarchical carbide derived carbon materials from steam and CO<sub>2</sub> activated wood templates for high rate lithium sulfur batteries

Marion, Adam<sup>a</sup>, Patrick Strubel<sup>b</sup>, Lars Borchardt<sup>a</sup>, Holger Althues<sup>b</sup>, Susanne Dörfler<sup>b</sup>, and Stefan Kaskel<sup>a,b</sup>

## Supporting Information

**Table S1** – element composition of pyrolyzed wood, activated wood and activated wood-CDC samples determined by EDX measurements.

|                          | C (at%) | O (at%) | Si (at%) | rest (at%) |
|--------------------------|---------|---------|----------|------------|
| <i>bioC</i> (from birch) | 94.6    | 5.2     | --       | 0.2        |
| H <sub>2</sub> O50       | 97.0    | 3.0     | --       | 0          |
| H <sub>2</sub> O50_CDC   | 94.8    | 3.5     | 0.6      | 1.1        |
| H <sub>2</sub> O80_CDC   | 96.5    | 2.5     | 0.2      | 0.8        |
| CO <sub>2</sub> 950_CDC  | 96.3    | 2.1     | 0.2      | 1.4        |

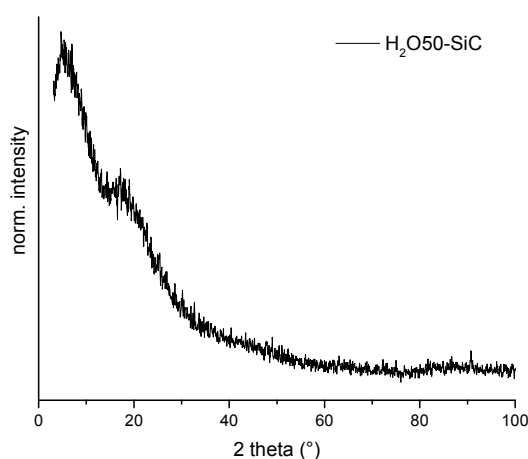

**Figure S1** – XRD pattern of bioC/SiC composite H<sub>2</sub>O50-SiC showing the amorphous character of SiC.

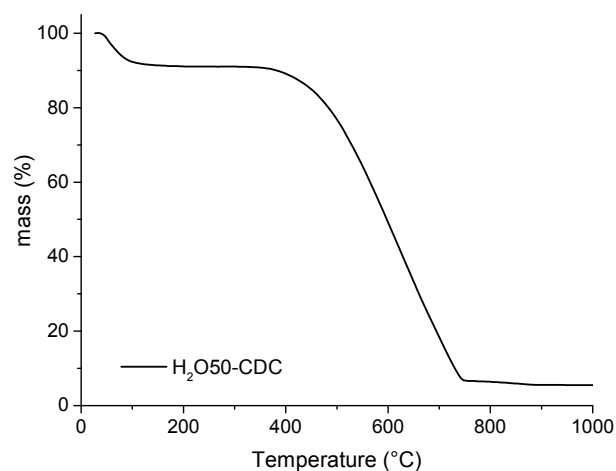

**Figure S2** – TG analysis of H<sub>2</sub>O50-CDC in air shows complete combustion of the material, indicating the high purity of carbon material.

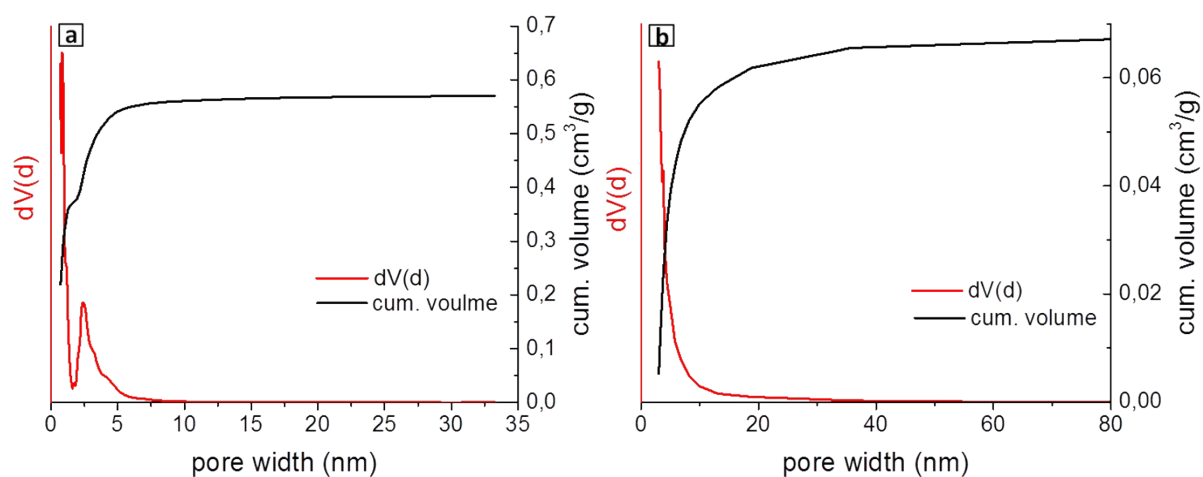

**Figure S3** – Pore size distribution with cumulative pore volume of H<sub>2</sub>O50-CDC calculated with a) QSDFT (slit, cylindrical pores, adsorption branch) and b) BJH theory.

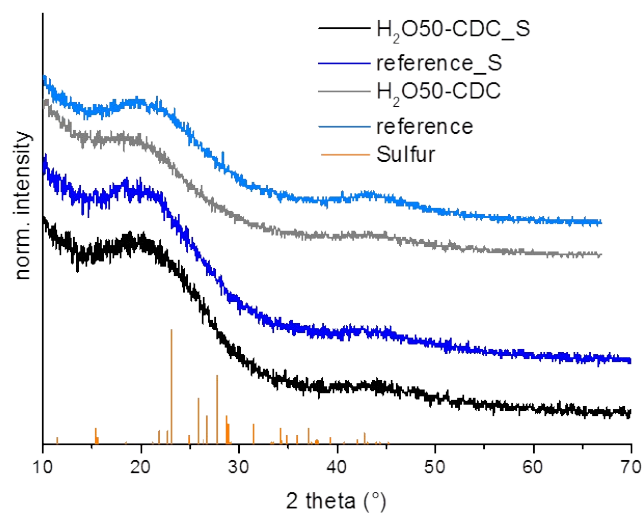

**Figure S4** - XRD pattern of the activated wood-CDC, the reference material, and C/S composites as well as pristine sulfur.

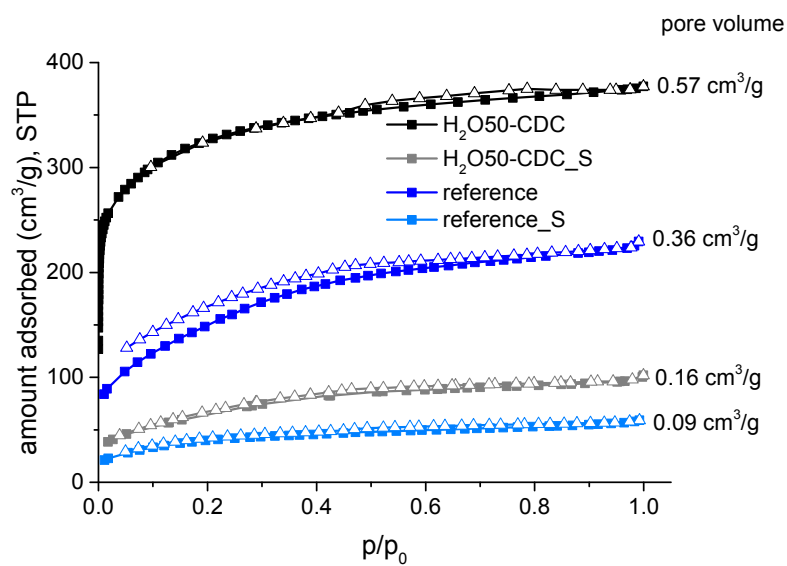

**Figure S5** - Nitrogen physisorption isotherms steam activated wood-CDC and reference material pristine and sulfur melt infiltrated, respectively.

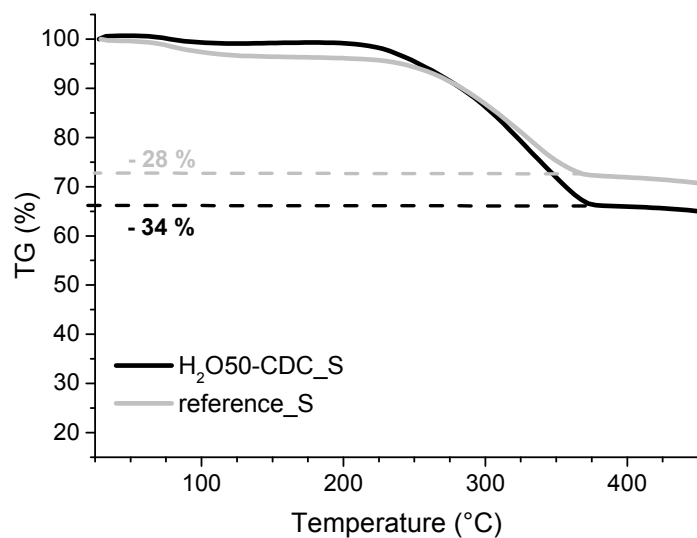

**Figure S6** – TG analysis of C/S composites H<sub>2</sub>O50-CDC\_S and reference\_S under inert atmosphere. Sulfur loadings are calculated from mass loss.

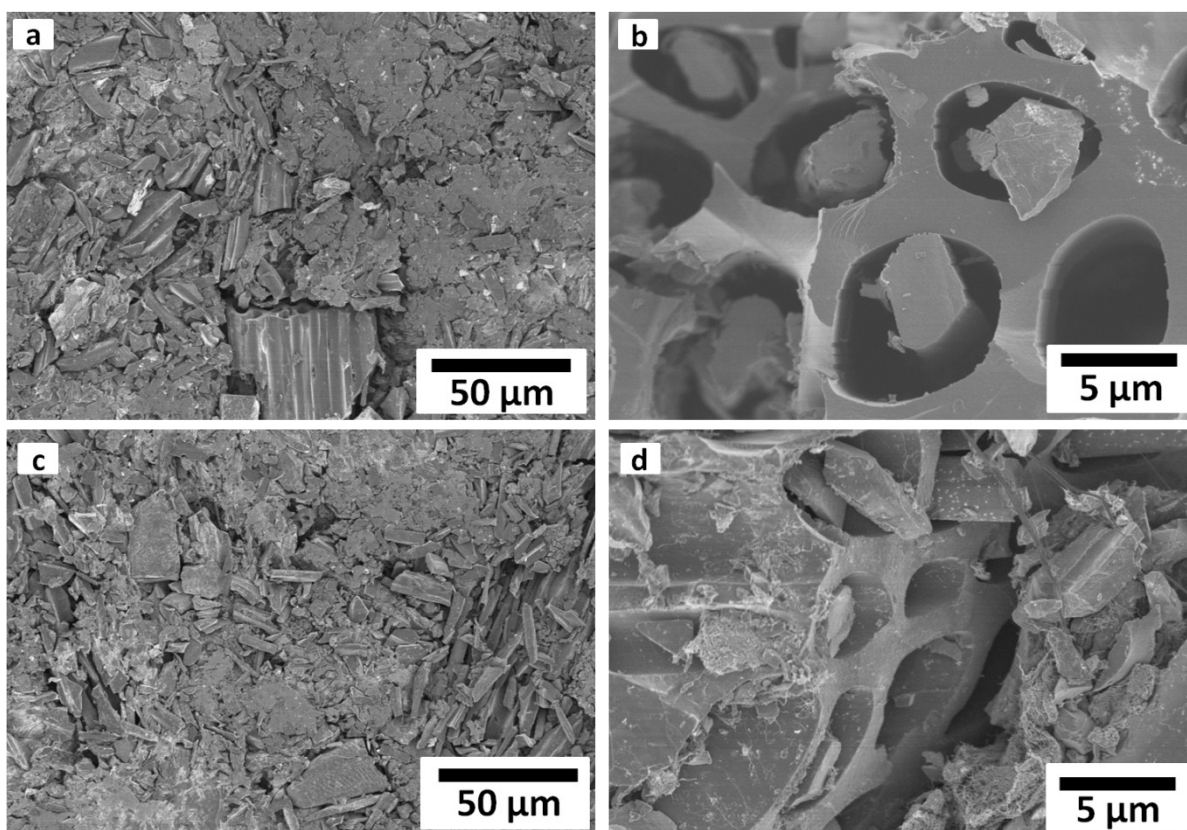

**Figure S7** - SEM images of sulfur cathodes prepared from reference\_S (a, b) and H<sub>2</sub>O50-CDC\_S (c, d), respectively, showing the surface morphology (low resolution) and single particle structure (high resolution).

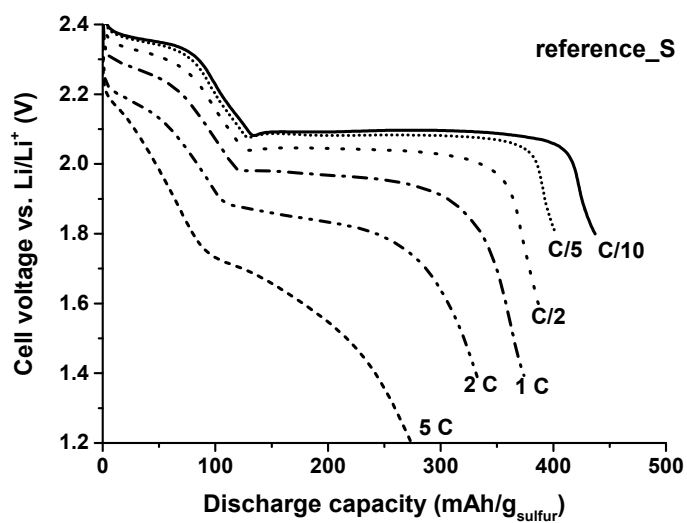

**Figure S8** - Typical discharge voltage profiles of reference material at different rates (taken from each 5 th cycle).

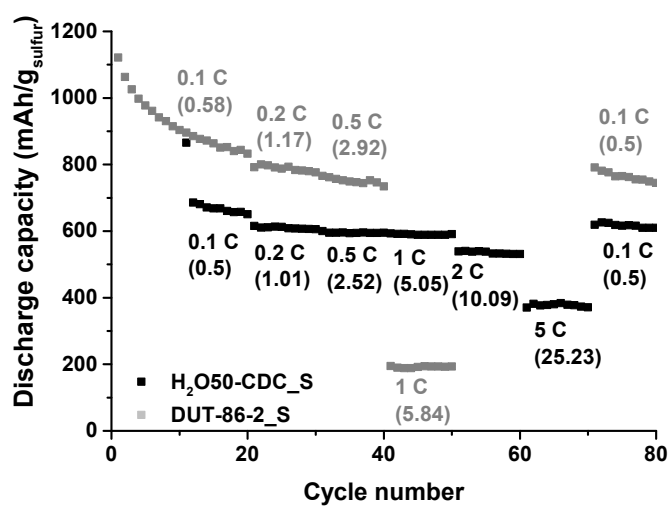

**Figure S9** - Rate capability of H<sub>2</sub>O50-CDC\_S in comparison to ordered hierarchical porous carbon DUT-86-2\_S<sup>46</sup>. Note the similar current densities as well as the strong capacity drop at 1 C for DUT-86-2\_S.
